# Supplementary material for: Electrical surface properties of nanoporous alumina membranes: influence of nanochannels’ curvature, roughness and composition studied via electrokinetic experiments
Source: Royal Society of Chemistry journal article supplement (doi:10.1039/d3cp04067d), 2023-01-01
Supplement: d3cp04067d1.pdf [file d3cp04067d1.pdf]

Supplementary Information

**Electrical surface properties of nanoporous alumina membranes: influence of nanochannels' curvature, roughness and composition studied *via* electrokinetic experiments**

*Ali Vakilinejad <sup>a</sup>, Emmanuelle Dubois <sup>a</sup>, Laurent Michot <sup>a</sup>, Marie Jardat <sup>a</sup>, Didier Lairez <sup>b</sup>, Serge Durand-Vidal <sup>a</sup>, Clément Guibert <sup>c</sup> and Nicolas Jouault <sup>a\*</sup>*

<sup>a</sup> Sorbonne Université, Laboratoire PHENIX, CNRS, UMR 8234, 4 place Jussieu, 75005 Paris, France

<sup>b</sup> Laboratoire des Solides Irradiés (LSI), École polytechnique, CNRS, CEA, Institut Polytechnique de Paris, 91128 Palaiseau cedex, France

<sup>c</sup> Sorbonne Université & CNRS, UMR 7197, Laboratoire de Réactivité de Surface (LRS), 4 Place Jussieu, 75252 Paris Cedex 05, France

\* Corresponding author: [nicolas.jouault@sorbonne-universite.fr](mailto:nicolas.jouault@sorbonne-universite.fr)

| Membrane name | Anodization U (V) | 2 <sup>nd</sup> Anodization Temperature (°C) | 2 <sup>nd</sup> Anodization average current density < j > (mA/cm <sup>2</sup> ) | Anodization time |                     | Wet etching time at 30 °C (min) | Porosity (%) |        |
|---------------|-------------------|----------------------------------------------|---------------------------------------------------------------------------------|------------------|---------------------|---------------------------------|--------------|--------|
|               |                   |                                              |                                                                                 | 2 <sup>nd</sup>  | 3 <sup>rd</sup> (s) |                                 | Top          | Bottom |
| OA-0.05       | 40                | 17.6                                         | 1.79                                                                            | 6 h 39 min       | 100                 | 29                              | 26           | 23     |
| OA-0.3        | 40                | 18.2                                         | 4.66                                                                            | 2 h 34 min       | 240                 | 16                              | 26           | 19     |
| OA-0.8        | 40                | 18.3                                         | 7.17                                                                            | 2 h              | 87                  | 18                              | 31           | 21     |
| Sul-0.3 (1)   | 25                | 18                                           | 4                                                                               | 6 h 4 min        | 2100                | ~ 45                            | 45           | 19     |
| Sul-0.3 (2)   | 25                | 18                                           | 4.7                                                                             | 6 h              | 2100                | ~ 45                            | 48           | 17     |
| Sel-0.3       | 45                | < 1.7                                        | 1.14                                                                            | 21 h 52 min      | 179                 | > 70                            | 23           | 14     |

**Table S1.** Summary of the anodization conditions used for the synthesis of AAOs.

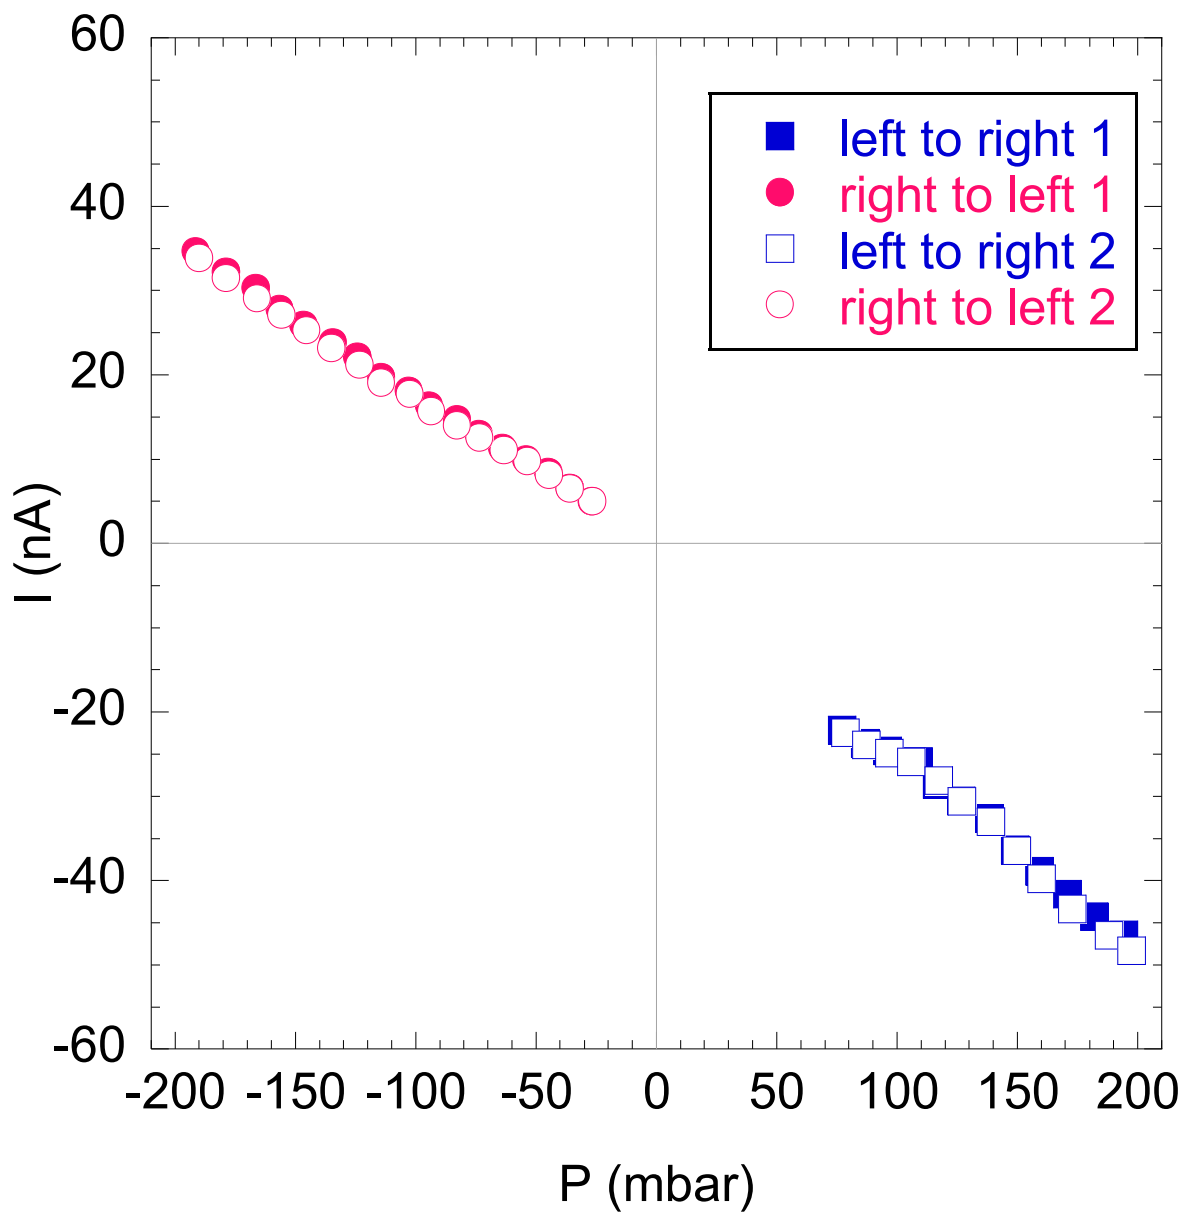

**Figure S1.** Raw P-I graph of tangential flow streaming current measurement on the top surface of the OA-0.8 AAO membrane at pH=10.4. The measurement composes of four steps: two from left to right (blue) and two in the opposite direction (red) flow.

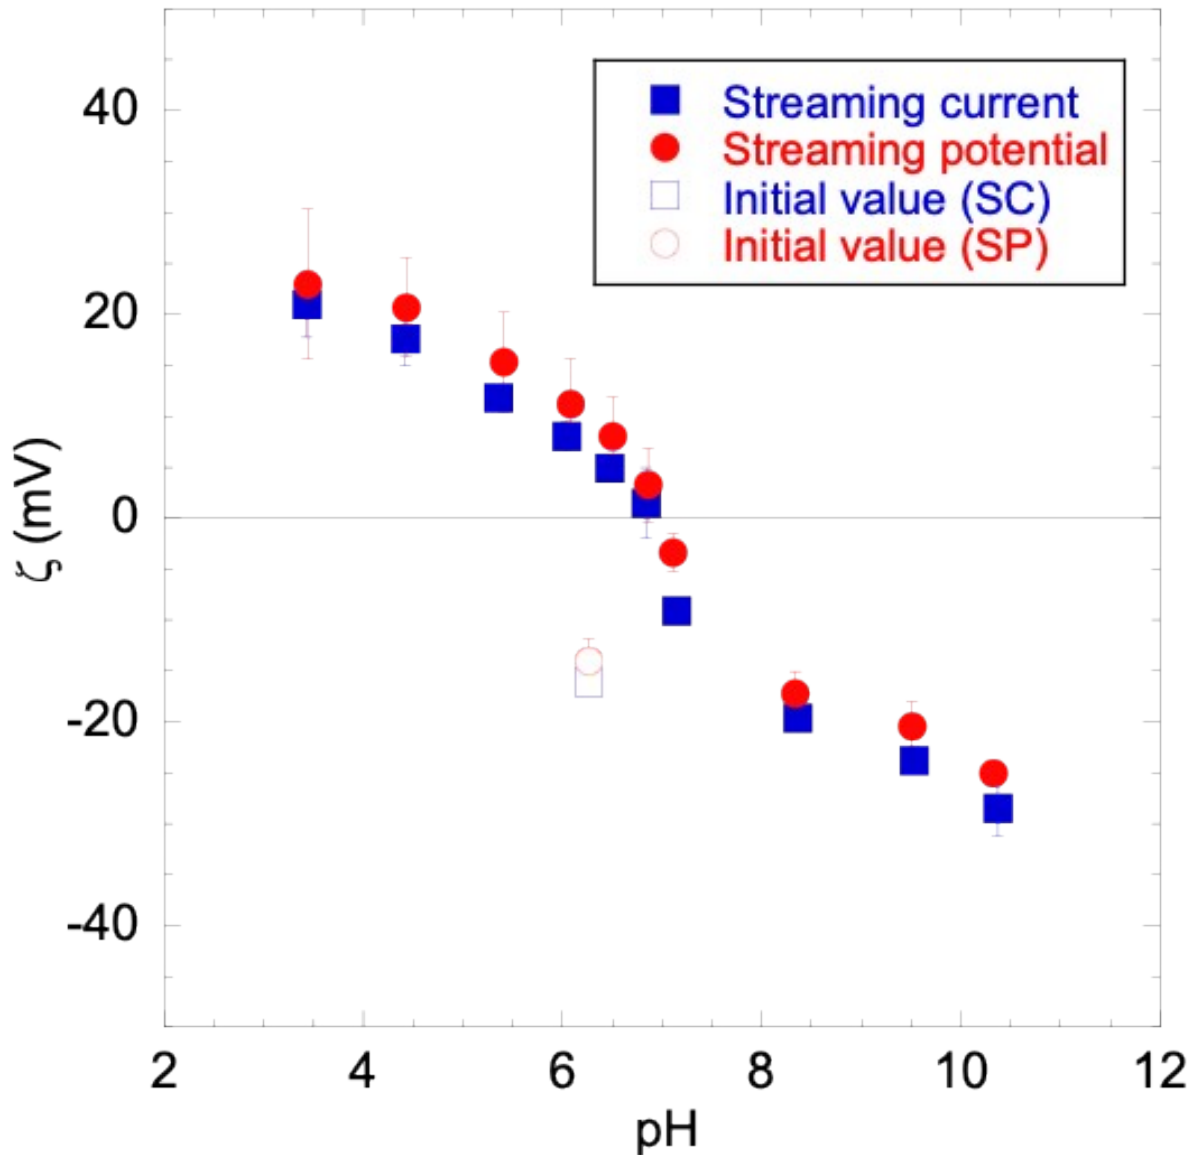

**Figure S2.** Comparison between the  $\zeta$ -potential values derived from the streaming current  $I_s$  (blue square) and streaming potential  $U_s$  (red circles) obtained by tangential SE. The measurements cycle was carried out on the bottom side of the OA-0.8 AAO membrane. The empty symbols show the first measurement in pure KCl solution at pH = 6.3. The initial negative value suggests that the AAO surface is contaminated by impurities. To wash away and desorb these impurities, the pH is directly adjusted to a high value (pH  $\approx$  10) and then decreased stepwise down to about 3 and the  $\zeta$ -potential is measured for each pH.

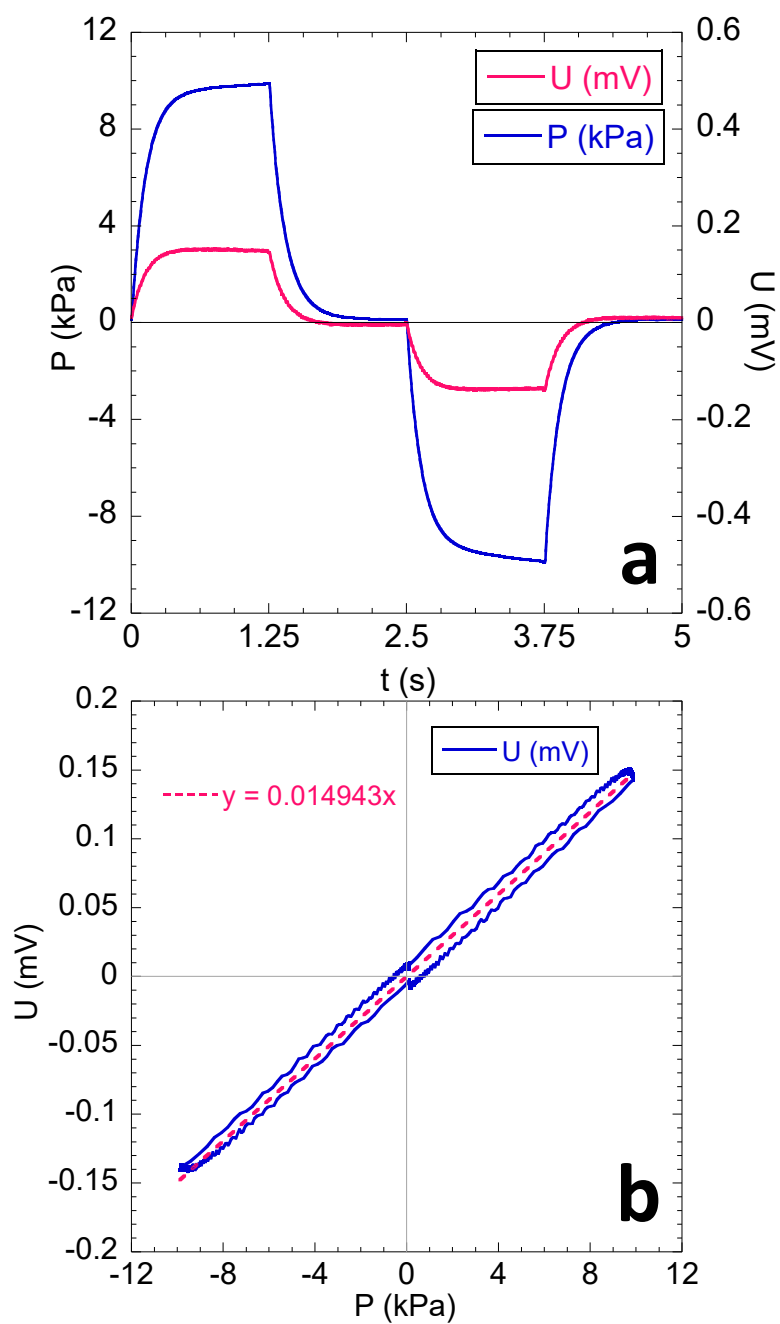

**Figure S3.** Raw data of the transverse SE for one “back and forth” cycle for OA-0.3 at  $\text{pH} \approx 6$ : **a)** pressure  $P$  and the resulting voltage  $U$  as a function of time **b)**  $U_s$  vs  $P$  diagram with the corresponding linear fit. The slope of the fit yields the  $dU/dP$  that is then converted to the  $\zeta$ -potential (see main text).

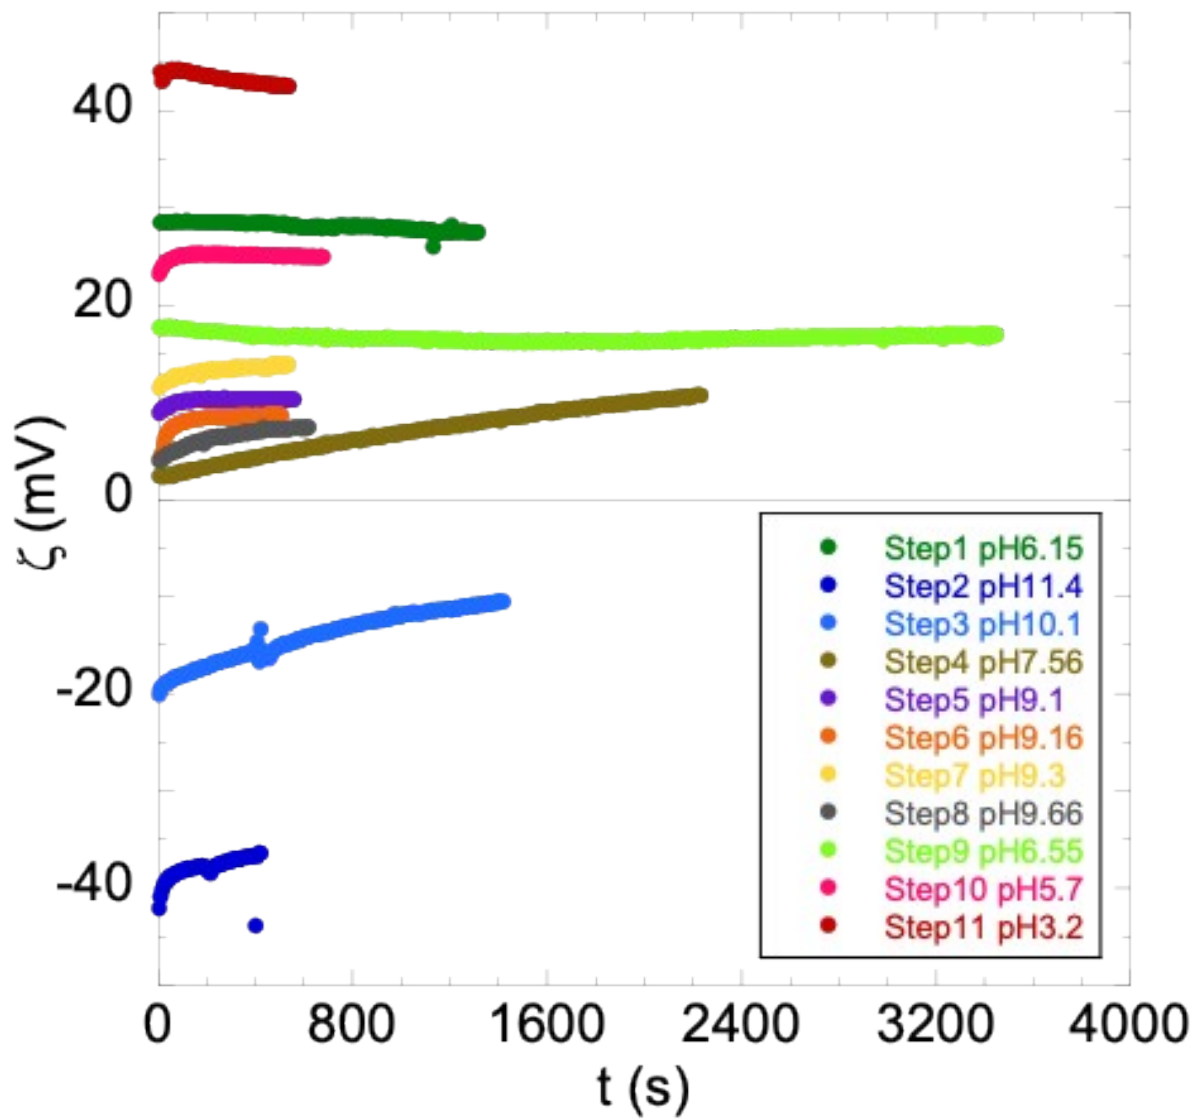

**Figure S4.**  $\zeta$ -potential obtained by transverse SE as a function of time at different pHs for OA-0.8 AAO membrane.

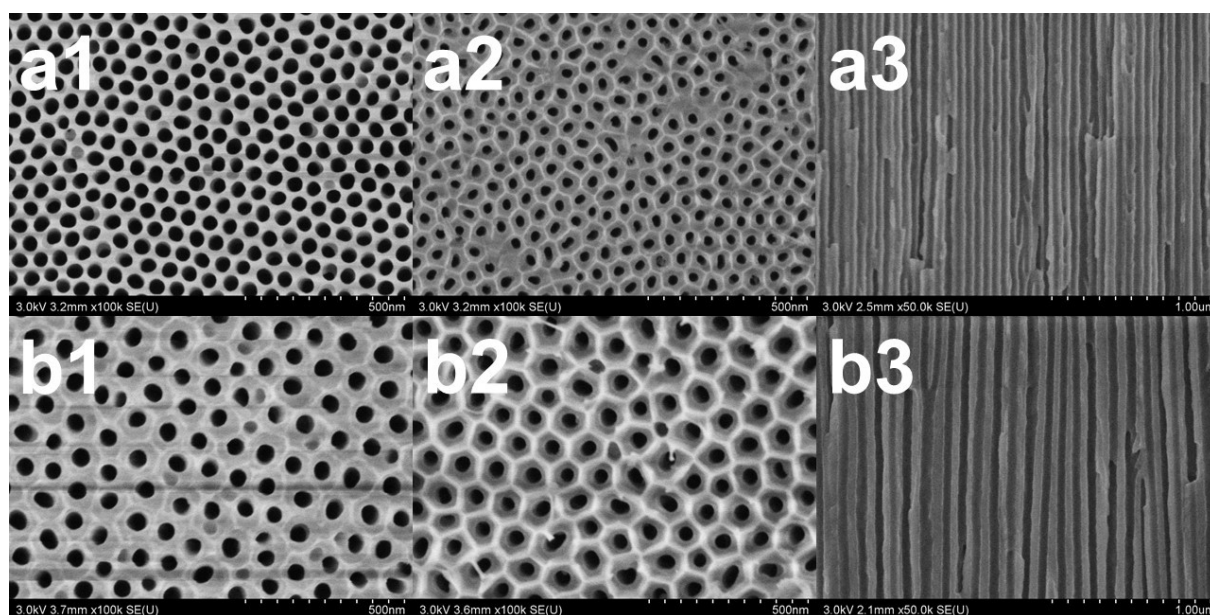

**Figure S5.** SEM images of the Sul-0.3M and Sel-0.3M membranes as synthesized in **a)** sulfuric acid and **b)** selenic acid 0.3M solutions from **1)** top **2)** bottom and **3)** section.

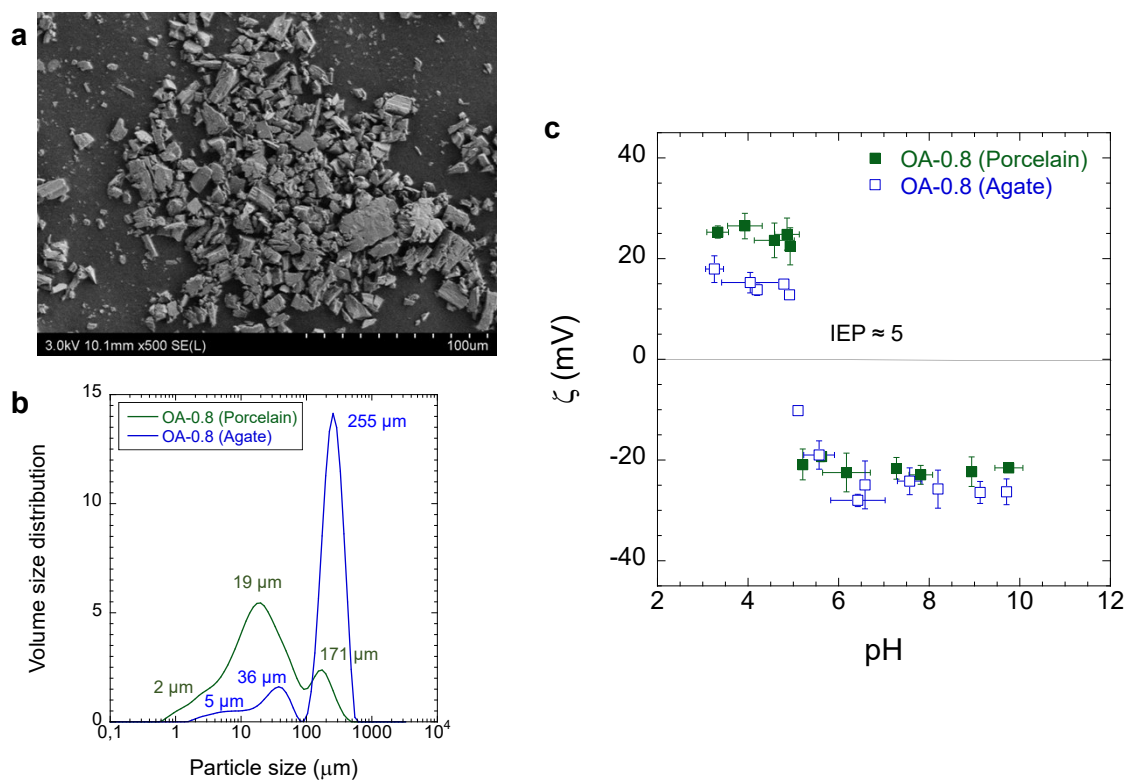

**Figure S6.** (a) SEM images of OA-0.8 AAO membrane manually grinded with an Agate mortar and pillar. (b) Volume size distribution as a function of particle diameter obtained by laser granulometry for OA-0.8 AAO grinded in porcelain (green line) or Agate (blue line) mortar. The volume size distribution is an average of 5 runs of measurements. (c)  $\zeta$ -potential of OA-0.8 membranes measured by electrophoretic mobility (EM) of the AAO membrane grinded in porcelain (full green squares) or Agate (open blue squares) mortar.



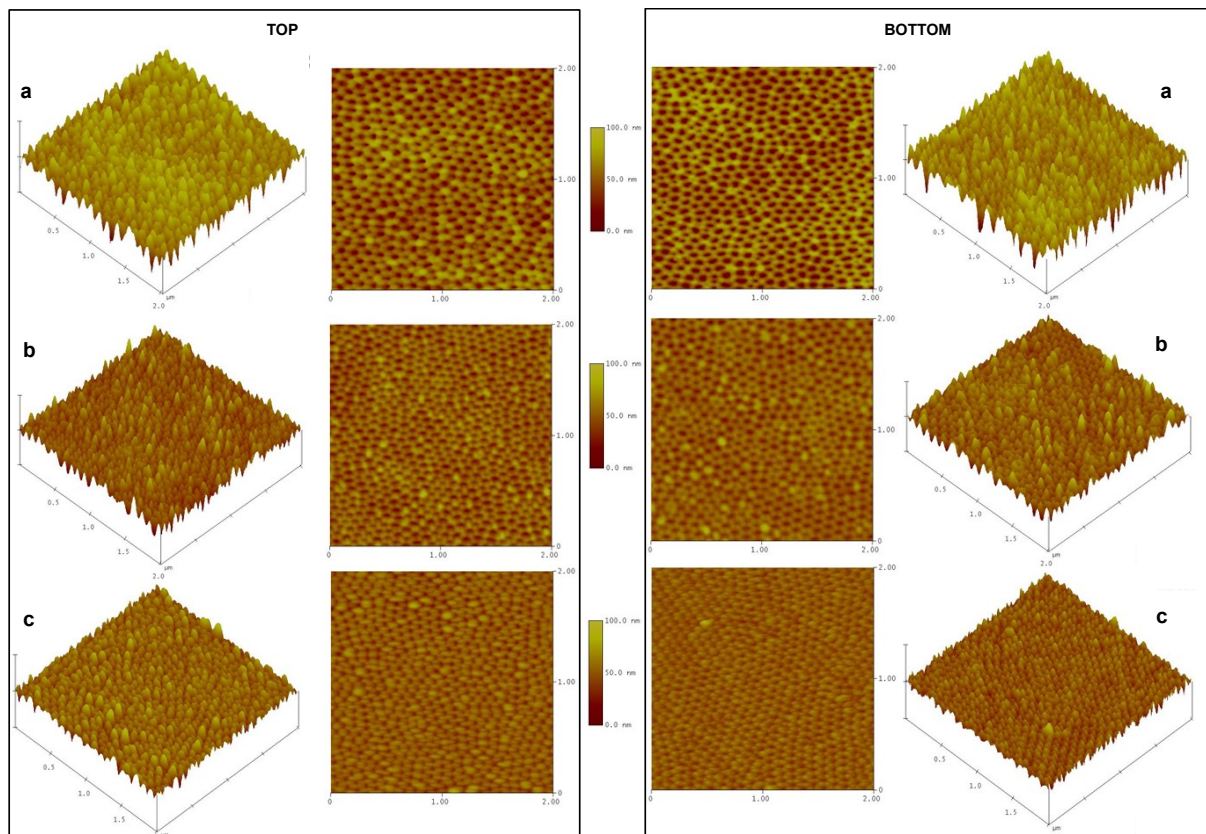

**Figure S7.** AFM images of top (left side) and bottom (right side) surfaces of AAO membranes: OA-0.05 (a), OA-0.3 (b), OA-0.8 (c). Horizontal scale 2x2 μm and vertical scale 100 nm (0 dark – 100 clear).
